# Supplementary material for: In vitro and in vivo MRI visualization of nanocomposite biodegradable microcapsules with tunable contrast
Source: Royal Society of Chemistry journal article supplement (doi:10.1039/c6cp03895f), 2016-01-01
Supplement: c6cp03895f2.pdf [file c6cp03895f2.pdf]

Table 1. Concentration of magnetite nanoparticle in the colloids applied for microcapsule shell formation, concentration of calcium carbonate microparticles in the water suspension that were used as template for microcapsule shell formation, polymer concentration during every adsorption cycle of microcapsule shell formation, surface density of magnetite NPs in the microcapsule shell, average distance between NP surface in the microcapsule shell d.

| Sample | Concentration of magnetite NPs in the colloids applied for microcapsule shell formation adsorptions, mg/ml | Concentration of microparticles CaCO <sub>3</sub> in the water suspension, mg/ml | Surface density of magnetite NPs in the microcapsule shell, m <sup>-2</sup> | Average distance between NP surface in the microcapsule shell d, nm | Concentration of polymers during every adsorption cycle of microcapsule shell formation, mg/ml |      |
|--------|------------------------------------------------------------------------------------------------------------|----------------------------------------------------------------------------------|-----------------------------------------------------------------------------|---------------------------------------------------------------------|------------------------------------------------------------------------------------------------|------|
|        |                                                                                                            |                                                                                  |                                                                             |                                                                     | PA                                                                                             | DS   |
| 1      | 0.064                                                                                                      | 46.4                                                                             | 2.16x10 <sup>14</sup>                                                       | 55                                                                  | 0.52                                                                                           | 1.04 |
| 2      | 0.064                                                                                                      | 23.2                                                                             | 4.33x10 <sup>14</sup>                                                       | 35                                                                  | 0.26                                                                                           | 0.52 |
| 3      | 0.064                                                                                                      | 11.6                                                                             | 8.65x10 <sup>14</sup>                                                       | 21                                                                  | 0.13                                                                                           | 0.26 |
| 4      | 0.064                                                                                                      | 5.8                                                                              | 17.3x10 <sup>14</sup>                                                       | 11                                                                  | 0.065                                                                                          | 0.13 |
| 5      | 0.064                                                                                                      | 2.9                                                                              | 34.6x10 <sup>14</sup>                                                       | 4                                                                   | 0.03                                                                                           | 0.06 |
